# Supplementary material for: Integrated platform for structural and functional analysis of terpene synthases of Cannabis sativa
Source: PeerJ. 2025 Jul 10;13:e19723. doi: 10.7717/peerj.19723 (PMC12256043; doi:10.7717/peerj.19723)
Supplement: Supplemental Information 2 [file peerj-13-19723-s002.xlsx]

## Sheet: CsTPS37FN Melt Curve
Temperature	01 MES (pH 5.5)			02 MES (pH 5.5) + 50mM NaCl			03 MES (pH 5.5) + 100mM NaCl			04 MES (pH 5.5) + 200mM NaCl			05 MES (pH 5.5) + 50mM KCl			06 MES (pH 5.5) + 100mM KCl			07 MES (pH 5.5) + 200mM KCl			08 MES (pH 5.5) + 50mM MgCl			09 MES (pH 5.5) + 100mM MgCl			10 MES (pH 5.5) + 200mM MgCl			11 BIS-TRIS (pH 6.0)			12 BIS-TRIS (pH 6.0) + 50mM NaCl			13 BIS-TRIS (pH 6.0) + 100mM NaCl			14 BIS-TRIS (pH 6.0) + 200mM NaCl			15 BIS-TRIS (pH 6.0) + 50 mM KCl			16 BIS-TRIS (pH 6.0) + 100 mM KCl			17 BIS-TRIS (pH 6.0) + 200 mM KCl
5	5713.9	6790.22	6252.06	7469.94	8742.99	8106.47	5613.76	10827	8220.39	5617.23	5128.83	5373.03	7035.35	7887.69	7461.52	6714.62	8391.25	7552.94	7425.75	5568.84	6497.3	9662.5	7708.15	8685.32	7382.11	7302.88	7342.5	7147.48	6979.67	7063.57	8030.43	9360.96	8695.69	8499.38	9861.98	9180.68	11800.8	7868.82	9834.8	5128.41	6079.35	5603.88	5700.12	10953.8	8326.95	16775.3	7627.09	12201.2	10916.5
6	5771.13	6842.6	6306.87	7230.61	8476.73	7853.67	5406.68	10514.6	7960.64	5452.11	4980.02	5216.06	6851.1	7804.94	7328.02	6435.46	8206.36	7320.91	6983.99	5296.01	6140	9530.2	7520.89	8525.54	7348.96	7256.46	7302.71	7054.5	6925.71	6990.11	7730.85	8959.37	8345.11	8224.52	9341.48	8783	11248.9	7698	9473.46	4813.14	5790	5301.57	5648.92	10322.8	7985.85	15963.4	7456.87	11710.1	10507.5
7	5587	6769.41	6178.21	7223.86	8246.37	7735.12	5417.38	10102.6	7760	5232.48	5026.38	5129.43	6807.62	7660.32	7233.97	6346.98	8322.13	7334.56	7057.13	5271.25	6164.19	9246.55	7240.72	8243.63	6948.8	7486.37	7217.58	7068.84	6975.05	7021.95	7716.86	8766.33	8241.6	8446.17	9333.68	8889.92	11188.5	7645.64	9417.08	4920.51	5835.39	5377.95	5507.59	10093.5	7800.57	15653.4	7284.57	11469	10340.5
8	5610.42	6584.89	6097.66	7007.02	7974.01	7490.51	5139.1	10108.7	7623.88	5197.68	4977.73	5087.7	6780.78	7687.76	7234.27	6330.81	8210.07	7270.44	6925.23	5136.74	6030.98	9168.9	7234.92	8201.91	6958.43	7164.37	7061.4	6728.78	6727.52	6728.15	7531.23	8629.07	8080.15	8276.77	9365.07	8820.92	10902.2	7520.84	9211.5	4607.61	5859.8	5233.7	5615.89	10071	7843.44	15386.2	7303.69	11344.9	10379.5
9	5418.05	6732.66	6075.35	6657.22	8034.7	7345.95	5220.36	9952.64	7586.5	5077.17	4931.42	5004.29	6739.14	7803.1	7271.12	6261.1	8065.29	7163.19	6689.59	5251.51	5970.55	9187.91	7268.07	8227.99	6576.47	7192.6	6884.53	6786.06	6849.18	6817.62	7483.88	8466.61	7975.24	7969.43	9137.82	8553.63	11140.9	7554.58	9347.76	4817.24	5557.23	5187.23	5342.23	9787.79	7565.01	14983.5	7257.79	11120.6	10040.8
10	5456.99	6741.63	6099.31	6888.26	8074.74	7481.5	5088.05	9837.55	7462.8	5107.61	4806.3	4956.95	6590.24	7565.01	7077.63	6256.41	8031.37	7143.89	6753	5181.22	5967.11	9148.04	7180.73	8164.38	6814.93	7038.2	6926.56	6800.78	6737.91	6769.35	7524.85	8493.15	8009	8150.33	9139.38	8644.86	11146.2	7366.06	9256.14	4660.19	5699.8	5179.99	5551.28	9661.99	7606.63	14772.6	7097.91	10935.3	10047.2
11	5524.68	6756.36	6140.52	6696.91	8088.69	7392.8	4987.23	10006	7496.64	5021.51	4738.11	4879.81	6461.85	7585.83	7023.84	6419.63	8113.54	7266.58	6801.83	5024.58	5913.2	9042.87	7187.12	8114.99	6837.63	7066.22	6951.93	6746.53	6590.15	6668.34	7184.49	8220.17	7702.33	8062.17	8944.55	8503.36	10886.8	7122.45	9004.61	4472.43	5534.18	5003.3	5223.74	9524.76	7374.25	14460.1	7079.03	10769.5	9835.49
12	5202.02	6374.4	5788.21	6691.95	7956.79	7324.37	5228.79	9878.75	7553.77	4956.83	4647.16	4802	6494.1	7636.56	7065.33	6381.82	7983.96	7182.89	6734.76	5022.47	5878.61	9155.84	7298.53	8227.18	6673.78	6924.4	6799.09	6527.65	6647.44	6587.55	6941.76	7865.9	7403.83	7929.54	8782.51	8356.03	10511.7	6967.13	8739.43	4332.4	5586.48	4959.44	5165.62	9344.63	7255.12	14324.4	7096.49	10710.4	9825.42
13	5230.49	6361.13	5795.81	6724.81	7984.2	7354.51	5159.1	9918.47	7538.78	4726.79	4609.75	4668.27	6546.09	7367.86	6956.98	6171.12	7678.75	6924.94	6546.64	5055.53	5801.09	9052.87	7085.25	8069.06	6577.27	7033.63	6805.45	6643.74	6710.77	6677.25	7004.12	7684.59	7344.35	7915.4	8694.67	8305.03	10477.9	7133.47	8805.68	4250.53	5506.66	4878.59	5276.43	9203.56	7240	14162.7	6926.86	10544.8	9863.78
14	5341.48	6217.39	5779.43	6462.16	7929.84	7196	4903.36	9622.38	7262.87	4848.79	4332.95	4590.87	6317.41	7320.71	6819.06	6030.74	7778.89	6904.81	6437.35	5069.88	5753.61	8876.86	7081.9	7979.38	6634.04	6841.92	6737.98	6311.96	6637.75	6474.86	6857.38	7692.69	7275.03	7847.89	8475.52	8161.71	10333.6	7003.89	8668.75	4402.87	5635.19	5019.03	5054.39	9284.27	7169.33	13924.6	7001.12	10462.9	9711.87
15	4994.2	6015.34	5504.77	6467.5	7734.46	7100.98	4938.47	9578.29	7258.38	4644.41	4444.17	4544.29	6280.7	7422.43	6851.57	5998.38	7829.72	6914.05	6545.09	5180.94	5863.01	8760.54	7004.87	7882.7	6660.72	6890.6	6775.66	6265.95	6462.06	6364	6852.65	7550.73	7201.69	7666.72	8551.82	8109.27	10123.9	6904.79	8514.32	4124.12	5437.97	4781.05	4981.91	9262.37	7122.14	13821.7	6917.07	10369.4	9555.83
16	5246.43	6184.71	5715.57	6700.37	7741.3	7220.84	4947.06	9512.88	7229.97	4500.1	4419.13	4459.61	6314.43	7394.41	6854.42	6097.06	7795.66	6946.36	6462.05	5100.53	5781.29	9015.97	6969.57	7992.77	6725.64	6730.82	6728.23	6508.35	6504	6506.18	6857.99	7283.19	7070.59	7481.31	8460.2	7970.76	10128.1	6856.18	8492.15	4038.58	5392.89	4715.74	4955.95	9028.68	6992.31	13548.8	6815.62	10182.2	9379.98
17	5133.77	6069.79	5601.78	6254.81	7624.05	6939.43	4539.77	9346.56	6943.16	4596.59	4527.62	4562.1	6112.24	7192.73	6652.49	6341.95	7831.48	7086.72	6420.97	4927.47	5674.22	9008.69	6815.19	7911.94	6685.71	6673.05	6679.38	6192.71	6688.61	6440.66	6751.95	7164.74	6958.34	7519.04	8125.4	7822.22	10200.7	6768.98	8484.85	4027.9	5316.69	4672.29	4843.07	8908.42	6875.75	13599.1	6674.84	10137	9274.69
18	5285.74	5927.4	5606.57	6333.46	7810.21	7071.84	4796.41	9224.23	7010.32	4738.31	4449.45	4593.88	6226.42	7389.14	6807.78	6115.14	7704.75	6909.94	6610.8	4999.75	5805.28	8936.79	6828.04	7882.42	6582.34	6686.17	6634.26	6292.02	6762.43	6527.22	6649.38	7095.75	6872.57	7563.36	8128.1	7845.73	9820.43	6800.97	8310.7	3810.95	5326.9	4568.93	4574.22	8792.28	6683.25	13286.6	6681.01	9983.83	9287.17
19	4869.65	6130.98	5500.32	6111.46	7428.78	6770.12	4987.87	9099.88	7043.88	4708.66	4429.24	4568.95	6184.99	7321.22	6753.1	6210.03	7821.02	7015.53	6638.38	5107.8	5873.09	9143.17	7063.46	8103.32	6460.27	6715.93	6588.1	6288.57	6498.28	6393.43	6429.01	7019.72	6724.37	7219.16	8142.76	7680.96	9704.24	6751.91	8228.07	3832.99	5216.48	4524.74	4720.19	8722.14	6721.16	13041	6548.97	9795	9198.27
20	4915.66	6199.4	5557.53	6162.46	7760.95	6961.71	4659.51	9320.09	6989.8	4503.96	4638.56	4571.26	5913.93	7439.21	6676.57	6023.63	7881.68	6952.65	6559.3	5196.55	5877.93	9242.03	6982.91	8112.47	6425.63	6886.94	6656.28	6010.34	6649.74	6330.04	6372.77	7053.61	6713.19	7283.79	8181.15	7732.47	9751.82	6740.83	8246.32	4015.84	5143.7	4579.77	4765.33	8770.98	6768.15	13031.2	6630.17	9830.71	9074.85
21	5083.03	5948.41	5515.72	6194.78	7748.23	6971.51	4770.42	9118.63	6944.52	4462.91	4490.09	4476.5	5825.16	7309.11	6567.14	5975.76	7794.97	6885.37	6751.55	5031.11	5891.33	9111.5	6875.34	7993.42	6533.88	6906.88	6720.38	6211.71	6670.24	6440.97	6196.79	6888.39	6542.59	7385.11	8152.34	7768.73	9347.27	6528.88	7938.08	3776.93	5109.99	4443.46	4740.44	8411.88	6576.16	12848.8	6454.44	9651.61	8975.61
22	4901.48	6008.15	5454.81	6128.74	7620.93	6874.83	4766.61	9279.46	7023.04	4519.5	4505.85	4512.67	6001.79	7205.62	6603.7	6059.54	7484.19	6771.86	6781.61	5026.84	5904.23	9194.96	7043.9	8119.43	6650.25	6917.2	6783.72	6428.96	6694.17	6561.56	6170.76	7106	6638.38	7245.9	8004.89	7625.39	9485.59	6748.07	8116.83	3770.32	5329.33	4549.83	4604.69	8650.31	6627.5	12756.4	6563.32	9659.87	9027.02
23	4876.08	6234.49	5555.28	6068.77	7566.93	6817.85	4639.21	9028.63	6833.92	4378.81	4439.35	4409.08	6087.2	7362.72	6724.96	6019.86	7737.22	6878.54	6735.04	5199.07	5967.05	9013.05	7071.84	8042.45	6369.36	6701.05	6535.21	6356.41	6689.01	6522.71	6178.19	6987	6582.6	7163.55	7970.4	7566.97	9462.75	6659.34	8061.05	3813.56	5235.14	4524.35	4729.34	8709.26	6719.3	12616.6	6583.81	9600.2	9102.95
24	5037.24	6140.45	5588.85	5888.49	7624.45	6756.47	4797.92	9069.01	6933.46	4216.48	4478.7	4347.59	6144.65	7246.01	6695.33	6393.8	7728.17	7060.98	6743.36	5035.49	5889.43	9101.65	7086.02	8093.84	6571.67	6741.93	6656.8	6326.68	6790.51	6558.59	6039.8	6684.34	6362.07	7291.05	7915.41	7603.23	9512.01	6687.85	8099.93	3678.99	5187.09	4433.03	4949.02	8636.5	6792.76	12479.9	6408.42	9444.14	9109.14
25	4712.61	6074.78	5393.7	5836.06	7603.84	6719.95	4700.75	9029.77	6865.26	4133.58	4137.66	4135.62	6018.68	7150.18	6584.43	6173.32	7816.47	6994.9	6555.11	5190.09	5872.6	9208.06	7136.11	8172.09	6520.92	6736.2	6628.56	6492.18	6869.34	6680.76	6131.17	6535.1	6333.14	7576.15	7684.29	7630.22	9192.71	6457.31	7825.01	3792.45	5215.1	4503.77	4685.4	8543.73	6614.57	12408.9	6435.97	9422.44	9021.21
26	4629.3	6140.38	5384.84	5724.94	7555.37	6640.15	4847.48	8955.57	6901.52	4181.95	4423.89	4302.92	6056.88	7353.35	6705.12	6106.64	7965	7035.82	6701.11	5220.8	5960.95	9203.18	6904.26	8053.72	6804.1	6876.39	6840.24	6475.12	6878.1	6676.61	6013.19	6615.04	6314.12	7429.55	7723.47	7576.51	9036.12	6576.8	7806.46	3714.26	5435.87	4575.07	4520.29	8541.74	6531.01	12276.4	6580.23	9428.31	8843.66
27	4552.68	6027.21	5289.94	5575.88	7835.65	6705.77	4977.35	8942.31	6959.83	4256.38	4468.31	4362.35	6365.01	7539.5	6952.25	6265.46	8035.7	7150.58	6781.45	5308.69	6045.07	9181.34	7002.42	8091.88	6906.06	7127.46	7016.76	6522.48	6743.02	6632.75	6068.8	6490.18	6279.49	7139.15	7768.22	7453.68	9039.73	6391.84	7715.79	3704.18	5415.95	4560.06	4619.22	8588.8	6604.01	12297.2	6477.48	9387.32	8573.44
28	4917.26	6163.29	5540.27	5479.76	7912.29	6696.02	4709.13	8792.51	6750.82	4154.45	4578.77	4366.61	6403.38	7677.87	7040.63	6478.46	8196.4	7337.43	6886.26	5517.68	6201.97	9294.5	7177.33	8235.92	6817.97	7147.24	6982.6	6483.48	7220.47	6851.98	5865.21	6500.28	6182.74	7130.64	7710.39	7420.51	8800.25	6380.34	7590.29	3408.2	5317.04	4362.62	4686.12	8526.98	6606.55	12081.6	6486.5	9284.05	8593.85
29	4833.37	6031.27	5432.32	5508.9	7748.38	6628.64	4888.18	8465.86	6677.02	4230.97	4543.73	4387.35	6360.85	7444.32	6902.59	6568.39	8069.93	7319.16	7056.66	5519.47	6288.07	9504.09	7254.3	8379.19	6836.68	7120.18	6978.43	6665.11	7291.87	6978.49	5764.2	6445.44	6104.82	7073.69	7557.13	7315.41	8802.75	6313.77	7558.26	3519.94	5406.3	4463.12	4515.61	8252.01	6383.81	11918.6	6490.72	9204.68	8652.72
30	4975.15	5848.38	5411.77	5740.7	7869.04	6804.87	5097.01	8471.65	6784.33	4329.45	4482.63	4406.04	6551.91	7568.29	7060.1	6750.02	8026.51	7388.27	7179.44	5426.4	6302.92	9574.16	7460.22	8517.19	7119.04	7330.79	7224.92	6676.56	7425.56	7051.06	5680.85	6314.02	5997.44	6776.84	7825.65	7301.24	8528.84	6328.06	7428.45	3529.31	5400.95	4465.13	4760.47	8289.92	6525.19	11809.4	6629.34	9219.36	8603.61
31	5068.02	6082.77	5575.4	5581.36	7892.68	6737.02	5087.53	8599.19	6843.36	4301.61	4455.73	4378.67	6620.28	7731.09	7175.69	6708.76	8037.37	7373.06	7474.12	5730.5	6602.31	9749.65	7588.57	8669.11	7296.43	7482.14	7389.29	7226.89	7438.9	7332.9	5784.53	6315.77	6050.15	7085.71	7487.17	7286.44	8542.05	6354.16	7448.1	3543.96	5398.51	4471.23	4912.45	8176.71	6544.58	11892.7	6674.85	9283.79	8604.46
32	4966.48	5980.14	5473.31	5717.01	7696.03	6706.52	5156.28	8573.12	6864.7	4287.44	4398.21	4342.82	6708.76	7685.21	7196.98	6779.11	8287.19	7533.15	7543.49	6030.96	6787.23	9894.73	7590.54	8742.63	7582.83	7554.76	7568.79	7299.59	7714.21	7506.9	5992.17	6268.86	6130.52	7182.19	7488.56	7335.38	8438.63	6321.37	7380	3432.41	5606.24	4519.32	4815.85	8400.76	6608.3	11523.1	6818.85	9170.95	8606.46
33	5021.52	6147.82	5584.67	5726.92	7954.94	6840.93	5131.58	8334.59	6733.08	4025.36	4420.7	4223.03	6625.26	7996.89	7311.07	7139.13	8454.17	7796.65	7872.52	6295.77	7084.14	10080.3	7721.34	8900.81	7744.97	7646.22	7695.59	7612.03	7835.69	7723.86	6236.41	6434.73	6335.57	7082.6	7722.74	7402.67	8587.02	6396.78	7491.9	3577.04	5712.75	4644.9	4982.2	8591.84	6787.02	11776.4	6943.05	9359.71	8671.5
34	5127.36	6131.26	5629.31	5625.26	7889.76	6757.51	5333.03	8170.76	6751.9	4372.05	4423.59	4397.82	6929.59	8161.96	7545.78	7098.98	8628.49	7863.73	8116.08	6363.91	7240	10283.6	7939.46	9111.52	7965.97	7962.85	7964.41	8071.99	8106.09	8089.04	6198.85	6403.04	6300.95	7226.58	7702.44	7464.51	8492.73	6460.34	7476.53	3559.58	5858.54	4709.06	4570.36	8662.27	6616.32	11557.9	7009.27	9283.59	8605.64
35	5309.55	6374.62	5842.09	5900.06	8200.22	7050.14	5533.14	7989.02	6761.08	4264.6	4334.53	4299.57	7281.73	8074.84	7678.28	7473.34	8589.59	8031.47	8396.24	6514.68	7455.46	10487.6	8321.67	9404.63	8250.51	8231.2	8240.85	8529.36	8380.12	8454.74	6440.7	6391.84	6416.27	7343.06	7746.28	7544.67	8479.75	6719.1	7599.43	3717.36	6034.03	4875.69	4948.51	8783.05	6865.78	11921.7	7076.01	9498.85	8868.64
36	5226.86	6540.15	5883.5	5856.47	8234.93	7045.7	5766.46	8257.79	7012.13	4085.5	4988.21	4536.85	7400.32	8373.85	7887.09	7704.05	8872.99	8288.52	8793.04	6822.29	7807.66	10867.3	8594.98	9731.15	8826.3	8849.58	8837.94	8713.66	8716.49	8715.07	6556.82	6774.6	6665.71	7556.13	7969.74	7762.93	8491.72	6736.27	7613.99	3564.39	6117.23	4840.81	5260.33	9046.78	7153.56	12029.9	7450.74	9740.3	8926.07
37	5342.91	6796.12	6069.52	5668.63	8617.58	7143.1	6057.64	8359.98	7208.81	4152.72	5096.32	4624.52	7516.43	8808.67	8162.55	8028.44	9009.14	8518.79	9301.62	7481	8391.31	11290.5	8618.48	9954.47	8991.08	9172.53	9081.8	9471.18	9329.39	9400.29	6611.86	7148.47	6880.16	7667.98	8261.31	7964.64	8378.16	6867.39	7622.77	3976.66	6555.4	5266.03	5942.17	9345.8	7643.98	11978.3	7786.81	9882.56	8948.19
38	5757.8	7045.59	6401.69	5829.82	8877.84	7353.83	6521.26	8245.74	7383.5	4431.27	5170.93	4801.1	7929.5	9007.23	8468.36	8454.05	9472.61	8963.33	9689.67	7734.84	8712.25	11710	9052.1	10381	9651.41	9700.24	9675.83	10238.9	10000.6	10119.8	6813.43	7271.37	7042.4	7647.54	8495.93	8071.73	8472.94	7056.69	7764.81	3978.21	6629.55	5303.88	5823.56	9690.98	7757.27	12308.6	8259.51	10284.1	9128.58
39	5882.45	7629.17	6755.81	6263.55	8995.58	7629.56	6680.33	8415.78	7548.06	4641.83	5425.35	5033.59	8329.53	9337.03	8833.28	8781.77	10070.4	9426.1	10202.8	8202.98	9202.91	12463.4	9533.12	10998.2	10200.1	10356	10278.1	11066.3	10513.7	10790	6983.82	7358.51	7171.17	8106.29	8666.39	8386.34	8452.51	7432.2	7942.35	3845	6743.42	5294.21	6197.39	10004.5	8100.97	12268.6	8712.08	10490.3	9596.7
40	5906.21	7978.55	6942.38	6676.19	9557.11	8116.65	6983.34	8658.78	7821.06	4604.5	5735.45	5169.98	8889.4	9631.2	9260.3	9337.13	10560.7	9948.9	10925.8	9153.59	10039.7	13169.7	10373.8	11771.8	11259.6	11114.5	11187	12225.6	11450.7	11838.1	7371.78	7563.08	7467.43	8515.43	9012.47	8763.95	8623.86	7567.13	8095.5	3932.83	6973.44	5453.14	6619.47	10229.3	8424.37	12660.2	9330.48	10995.3	10223.2
41	6349.76	8522.29	7436.02	6722.69	10110.5	8416.58	7427.83	8953.13	8190.48	4622.82	6132.56	5377.69	9430.69	10397	9913.86	9763.08	11408.6	10585.8	11985.3	10148.2	11066.8	13868	11131	12499.5	11941.8	12181	12061.4	13181.1	12583.8	12882.4	8125.9	8067.73	8096.82	9109.19	9314.05	9211.62	8964.69	8168.77	8566.73	4194.93	7318.79	5756.86	7424.34	10834.1	9129.24	13062.5	10007.5	11535	11150.1
42	6742.18	9204.8	7973.49	6930.93	10775.6	8853.27	8158.81	8904.01	8531.41	4848.23	6436.72	5642.47	10027.8	10969.3	10498.6	10798.8	12250.3	11524.5	12745.5	11281.1	12013.3	14936.2	11881.2	13408.7	13112.2	13377.4	13244.8	14643	13485	14064	8906.93	8746.38	8826.66	9532.3	9721.18	9626.74	9224.13	8478.52	8851.33	4861.48	7715	6288.24	8086.71	11395.6	9741.14	13636.2	10812.3	12224.3	12233.7
43	7178.44	10060.1	8619.25	7238.13	11483.5	9360.82	8743.27	9279.17	9011.22	5211.65	6992.77	6102.21	10816.1	11790.8	11303.5	11684.5	13651.7	12668.1	13980.5	12559.6	13270.1	16331.3	12946	14638.7	14372.7	14611.4	14492.1	15987.2	14371.2	15179.2	9677.62	9221.38	9449.5	9747.42	10330.5	10039	9968.63	9072.04	9520.33	5022.39	8408.58	6715.48	8772.32	12014.1	10393.2	14532.9	11828	13180.5	13264.7
44	7592.62	10846.1	9219.37	7954.85	12283	10118.9	9360.28	9746.37	9553.33	5374.35	7522.01	6448.18	11764.8	12714.3	12239.6	12915	14555.3	13735.1	15382.7	13740.4	14561.6	17824.8	14300.4	16062.6	15675	15789.2	15732.1	17036.4	15164.8	16100.6	10275.3	10199.8	10237.6	10663.9	11112.5	10888.2	10676.4	9967.41	10321.9	4987.74	9029.55	7008.64	9488.86	13067.1	11278	15745.1	12908.8	14326.9	14544.7
45	8111.53	11908	10009.8	8792.25	13269.8	11031	10021.5	10674.7	10348.1	5643.91	8019.56	6831.73	12710.7	13806.2	13258.4	13845.9	15637.6	14741.8	16474.9	15245.9	15860.4	19134.3	15558.8	17346.5	16741.8	17025.9	16883.9	17935.1	15909.6	16922.4	10435.5	10586.9	10511.2	11476	12221.4	11848.7	11595	10724	11159.5	5204.36	9694.82	7449.59	9924.94	14112.4	12018.7	17165.4	13986.7	15576.1	15789.1
46	8742.77	12549.3	10646	9440.34	14109.6	11775	10924.9	11701.6	11313.3	6189.91	8586.82	7388.36	13540.1	14871	14205.6	14936.9	16862.5	15899.7	17869.8	16438	17153.9	20714.2	17090.5	18902.4	17773.9	17973	17873.5	18782.1	16220	17501	10775	11030.7	10902.8	12627.3	13238.9	12933.1	12801.6	11679.7	12240.7	5438.56	10136.8	7787.68	10445	14914.2	12679.6	18248	14835	16541.5	16641.1
47	9321.09	13482	11401.5	10326	15043.2	12684.6	11302.3	12425.5	11863.9	6170.53	8987.31	7578.92	14410.3	16051.4	15230.9	15703.9	17949.9	16826.9	18612.8	17528.2	18070.5	22325.8	17911.8	20118.8	18537	18838.6	18687.8	19149	16366.3	17757.6	11261.4	11143.3	11202.3	13409.8	13789.7	13599.8	13556	12306.7	12931.3	5550.99	10595.2	8073.11	11031.9	15567.2	13299.5	19113.5	15397.7	17255.6	17509.9
48	9490.85	13924.1	11707.5	10875.1	15694.9	13285	11991.4	12734.7	12363	6150.74	9169.73	7660.23	15134.5	16601.4	15868	16351.1	18423.7	17387.4	19123.5	18296.9	18710.2	23231	18581.9	20906.5	18718.5	19161.1	18939.8	19256.5	16366.1	17811.3	11236.4	11076.3	11156.4	13732	14382.1	14057.1	14016	12733.8	13374.9	5580.73	10899.2	8239.98	11144.2	15726.8	13435.5	19598.4	15596.7	17597.5	18101
49	9788.52	14273.4	12031	11215.6	16015.1	13615.4	12386.7	13152.4	12769.5	6199.75	9338.83	7769.29	15283	17029.4	16156.2	16810.3	18709.6	17759.9	19386	18554.6	18970.3	23801.9	19273.6	21537.7	19083.5	19410.5	19247	19432.6	16427.3	17930	11214.7	11138.5	11176.6	13979	14743.2	14361.1	14209.8	12874.5	13542.1	5684.01	10931.9	8307.95	11107.2	16016.5	13561.9	20055.8	15929.9	17992.9	18592.9
50	9985.19	14135.7	12060.4	11415.8	16205.1	13810.4	12459.1	13388.6	12923.8	6233.41	9220.85	7727.13	15512.2	16998.5	16255.4	17164.2	18734.2	17949.2	19407.3	18549.3	18978.3	24120.7	19629.3	21875	19267.4	19418.9	19343.1	19352.4	16368.7	17860.6	11371.1	11192.3	11281.7	13935.2	14790.2	14362.7	14322.1	13084	13703	5440.82	10733.8	8087.33	11105.1	16116.4	13610.8	20243.5	15941.4	18092.4	18825.8
51	10175.4	14614.2	12394.8	11311.4	16541.8	13926.6	12554.7	13511.5	13033.1	6157.39	9324.35	7740.87	15640.7	17272.2	16456.5	17122.3	19050	18086.2	19400.6	18905.7	19153.2	24578.4	19956.1	22267.3	19537.6	19714.1	19625.8	19631.9	16364.4	17998.1	11476.2	10997.1	11236.6	14318.1	14695.7	14506.9	14461.4	12973	13717.2	5693.56	10781.7	8237.64	11183.2	16111.3	13647.2	20419.2	16067.4	18243.3	18716.9
52	10249.6	14607.6	12428.6	11366.1	16342.1	13854.1	12619	13354.1	12986.5	6452.05	9391.98	7922.01	15637.5	17228.2	16432.9	17085.2	18953.6	18019.4	19491	19068.2	19279.6	24730.5	20016	22373.2	19415.9	19530.4	19473.1	19743.5	16190.6	17967.1	11309.3	11069.7	11189.5	14129.3	14692.7	14411	14482.1	12910.5	13696.3	5580.68	10941.5	8261.1	11191.9	16246.3	13719.1	20252.5	15920.1	18086.3	18767.1
53	10305.9	14546.4	12426.1	11387.7	16302.9	13845.3	12619.2	13588.5	13103.9	6330.26	9491.59	7910.93	15510.6	17255.2	16382.9	17039.2	19049.7	18044.5	19334.8	19143.4	19239.1	24401.8	19968.7	22185.2	19483.5	19757.5	19620.5	19448.3	16088.3	17768.3	11435.8	11130.1	11282.9	14411.7	14801.1	14606.4	14474	12944	13709	5607.2	10717.3	8162.27	11214.7	16297.8	13756.2	20201.9	16011.3	18106.6	18661.5
54	10229.7	14548.4	12389	11410.4	16642.3	14026.4	12495	13524.8	13009.9	6327.66	9342.76	7835.21	15323	17412	16367.5	16921.2	19069.2	17995.2	19505.6	19248	19376.8	24566.3	19918.9	22242.6	19270.7	19872.5	19571.6	19566.6	15925.2	17745.9	11621.5	11130.5	11376	14421.6	14801.2	14611.4	14599.4	12752.7	13676	5629.39	10743.6	8186.47	11047.5	16190.6	13619.1	20280.2	16023.9	18152	18758.6
55	10248.1	14643.1	12445.6	11262.6	16499.2	13880.9	12470.1	13327.9	12899	6194.55	9386.78	7790.66	15453.8	17433.6	16443.7	16927.1	18874.5	17900.8	19363.6	19357.9	19360.8	24811.5	20136	22473.8	19348.4	19878.1	19613.2	19486.7	15776.7	17631.7	11556.4	11060.5	11308.5	14125.1	14807.2	14466.2	14738.2	12711.9	13725	5405.48	10696.3	8050.89	11256.1	16099	13677.5	20173.3	15972.7	18073	18738
56	10409.3	14387	12398.1	11193.6	16498	13845.8	12550.9	13398.9	12974.9	5942.93	9369.83	7656.38	15053	17430.3	16241.7	17077.8	19061.4	18069.6	19347	19525.1	19436.1	25017	20423.1	22720	19148.7	19996	19572.4	19111.7	15822.7	17467.2	11743.4	10977.4	11360.4	14539.5	14829.1	14684.3	14665	12707.4	13686.2	5443.94	10717.9	8080.92	11311.5	16276.5	13794	20090.8	16072.5	18081.7	18602.8
57	10257.7	14386.3	12322	11187.8	16364.8	13776.3	12584.6	13381.9	12983.3	6189.07	9194.26	7691.66	15163.5	17326.2	16244.9	16998.3	18783.2	17890.8	19328.7	19558.5	19443.6	25198.4	20681.8	22940.1	19167.5	19867.3	19517.4	19251.7	15771.5	17511.6	11610.6	11115.9	11363.3	14618.7	14874.5	14746.6	14677.8	12663.9	13670.8	5558.73	10739.6	8149.17	11248.8	16212.3	13730.5	20469.2	16132.8	18301	18779.5
58	10093	14406.4	12249.7	11242	16296.8	13769.4	12673.3	13503.5	13088.4	6333.37	9280.19	7806.78	14955.9	17321.3	16138.6	16881.1	18677.1	17779.1	19258.9	19611.6	19435.2	25118.3	20662.8	22890.6	19044	19975	19509.5	19392.2	15763.1	17577.7	11714.9	10861	11288	14772.1	14824.1	14798.1	14789.3	12612.9	13701.1	5672.42	10676.9	8174.65	11119.5	16249.4	13684.5	20541.2	16025.3	18283.3	18975.3
59	10205.7	14323.6	12264.6	11168.1	16277.9	13723	12550.9	13528.1	13039.5	6272.83	9122.5	7697.66	14878.9	17494.2	16186.5	17037.7	18765.9	17901.8	19216.9	19780.4	19498.6	25016.8	20435.2	22726	19157.8	20050.6	19604.2	19329.4	15676.6	17503	11795.1	10794.3	11294.7	14612.6	14905.1	14758.9	14696.6	12447.2	13571.9	5677.78	10524.7	8101.23	11065.2	16245.2	13655.2	20518.6	16022.7	18270.7	18874.3
60	10230.8	13947.5	12089.2	11141.4	16228.6	13685	12586	13424.1	13005.1	6293.52	9087.3	7690.41	14693.1	17464.1	16078.6	16852.3	18790.5	17821.4	19072.5	19599.5	19336	24947.6	20480	22713.8	18797.9	20058.3	19428.1	19146.1	15577.6	17361.9	11642.9	10968.9	11305.9	14681.7	14940.3	14811	14743.1	12382.2	13562.7	5647.6	10599.4	8123.48	11096.6	16306.4	13701.5	20366.5	16229.9	18298.2	18622.6
61	10337	13851.8	12094.4	10836.9	16369.4	13603.1	12368.9	13233	12801	6338.58	8982.85	7660.72	14678.6	17435.6	16057.1	16752.7	18615.8	17684.3	18673.7	19677.6	19175.6	24706	20555.3	22630.7	18695	20201.6	19448.3	19066.8	15635.4	17351.1	11779.6	11037.5	11408.5	14546.3	14650.6	14598.5	14684.5	12428.7	13556.6	5832.28	10564.6	8198.42	11310.4	16276.5	13793.4	20576.9	16334.8	18455.8	18703.7
62	10351.5	13915.8	12133.7	10790.3	16359.9	13575.1	12611.5	13295.2	12953.4	6360.83	9198.79	7779.81	14413.5	17467.7	15940.6	16859	18589.6	17724.3	18694.9	19674.7	19184.8	24927.3	20449.9	22688.6	18601.5	20226.7	19414.1	19297.5	15505	17401.3	12026.3	10892.4	11459.4	14688.1	14751.5	14719.8	14751	12469.6	13610.3	5799.23	10636.2	8217.71	11457.2	16228.4	13842.8	20599.3	16190.1	18394.7	19007.5
63	10026.2	13975.4	12000.8	10741.1	16763.4	13752.3	12531.3	13568.1	13049.7	6162.8	9196.67	7679.74	14394.1	17662.7	16028.4	17008.2	18867.3	17937.8	18347.3	19650.7	18999	24907.9	20594	22750.9	18374.7	20293.7	19334.2	18973.3	15400.4	17186.9	11911.8	10864.7	11388.2	14815.5	14793.1	14804.3	14771.4	12583.7	13677.5	5642.84	10705.4	8174.09	11301.5	16410	13855.8	20544.4	16266.6	18405.5	18883.7
64	10108.4	13644.1	11876.2	10718.9	16647.2	13683	12404.3	13456.6	12930.5	6122.5	9097.34	7609.92	14335.5	17524.7	15930.1	16932.2	18796.9	17864.6	18237.6	19785.2	19011.4	24658.4	20383.3	22520.8	18334.4	20291.5	19312.9	18979.2	15657.4	17318.3	12022.7	10921.2	11471.9	14865.5	14671.3	14768.4	14883.6	12839.8	13861.7	5557.34	10712.4	8134.85	11362.4	16381.8	13872.1	20487.3	16147.8	18317.6	18993.7
65	9875.08	13549.6	11712.4	10771.5	16531.9	13651.7	12222.9	13432.1	12827.5	6241.77	9052.52	7647.15	13819.4	17488.1	15653.8	16799.1	18577.2	17688.1	18000.6	19647.1	18823.9	24521.1	20214.1	22367.6	18398.7	20134	19266.4	18754	15504	17129	12030.4	10937.7	11484.1	14875.7	14511.3	14693.5	14936.6	12850	13893.3	5695.92	10965.6	8330.78	11301.7	16523.9	13912.8	20367.7	16183.8	18275.8	19023.6
66	10002.7	13412.8	11707.8	10691.7	16780	13735.8	12465.8	13570.8	13018.3	6317.84	9096.04	7706.94	14164.6	17157.8	15661.2	16511	18572.6	17541.8	17992.5	19760.4	18876.5	24088.7	20093.1	22090.9	18339.1	20224.7	19281.9	18783.9	15580.5	17182.2	11863.6	10642.2	11252.9	15013.4	14638.9	14826.1	14899.5	12888.3	13893.9	5637.69	10608.7	8123.19	11348.9	16337.6	13843.3	20104.2	16222.6	18163.5	18890.8
67	9886.57	13313.5	11600	10863.2	16445.1	13654.1	12665.4	13522.5	13094	6063.77	9187.57	7625.67	13910.6	17270.6	15590.6	16411.5	18066.5	17239	17906.1	19477.8	18691.9	23994.5	20119.8	22057.1	18098.3	20151.3	19124.8	18549.2	15619.5	17084.3	12153.8	10686.2	11420	15169.8	14611.7	14890.8	14964	13116.8	14040.4	5966.37	10973.3	8469.82	11453.8	16563.3	14008.6	20016.3	16205.2	18110.8	19076.2
68	10082.9	13466.4	11774.7	10537.4	16540.1	13538.8	12553	13597.4	13075.2	6102.98	9091.69	7597.34	13780.2	17303.5	15541.9	16197.6	18273	17235.3	17768.5	19203.7	18486.1	24042.2	20004.7	22023.4	18151.2	20140.1	19145.6	18986.3	15493.6	17240	12203.2	10874.8	11539	15374.2	14717.2	15045.7	14779.1	13153	13966	5998.57	11054.3	8526.42	11395.5	16440.4	13917.9	20328	16226.5	18277.2	19203.3
69	9991.11	13171.4	11581.3	10679.6	16546.2	13612.9	12507.9	13790.9	13149.4	5793.86	8963.39	7378.62	13708.8	17368.1	15538.5	16387.5	18283.7	17335.6	17561.9	19281.1	18421.5	23841	19805	21823	18019.3	19991.1	19005.2	18655	15606.5	17130.8	12023.3	10825.1	11424.2	15528	14722.8	15125.4	14933.9	13363.6	14148.7	5943.83	11610.4	8777.12	11315.1	16470.4	13892.7	19947.2	16371.3	18159.2	19180.1
70	10070.7	12798.4	11434.5	10655.9	16591.8	13623.8	12401.8	13685.5	13043.6	5869.36	9016.02	7442.69	13564.2	17412.9	15488.5	16306.5	17939.7	17123.1	17337.8	19288.2	18313	23848.6	19808.7	21828.6	18035.5	19885.6	18960.6	18660.3	15434.9	17047.6	12311.6	10955.5	11633.6	15607	14715.2	15161.1	15071.9	13402.5	14237.2	5874.16	11489.1	8681.63	11244.4	16496.2	13870.3	19996	16249.5	18122.8	19157.3
71	9741.06	12842.1	11291.6	10309.3	16834.9	13572.1	12370	13974.8	13172.4	5930.58	9093.47	7512.02	13314.6	16940.1	15127.3	16158	17792.6	16975.3	17168.9	19320.5	18244.7	23536.2	19778.3	21657.2	17734.6	19992.2	18863.4	18590.5	15176.1	16883.3	12287.5	11036.8	11662.1	15689.5	14560.3	15124.9	15080.4	13410.4	14245.4	6138.9	11687.2	8913.03	11213.1	16288.9	13751	19789.8	16068.2	17929	19067.2
72	9784.39	12607.3	11195.8	10489.7	16720.3	13605	12451.1	14186.1	13318.6	6066.83	9278.92	7672.88	13094.4	17064.3	15079.4	16141.5	17496.7	16819.1	17050.3	18920.6	17985.4	23206.2	19359.1	21282.7	17798.3	20164.5	18981.4	18528.8	15350.9	16939.8	12157.7	10935.1	11546.4	15831.7	14582.4	15207	15108.4	13664.1	14386.3	5989.41	11716	8852.69	11006.9	16408.4	13707.6	19285.6	16454.5	17870	18946
73	9762.85	12527.7	11145.3	10551.7	16679.5	13615.6	12709.5	14181.3	13445.4	6091.07	9193.33	7642.2	12739.2	16925.8	14832.5	16078.2	17231.3	16654.8	16741.1	18866.8	17803.9	23122.6	19255.1	21188.9	17580.6	19894.5	18737.6	18388.8	15397	16892.9	12166.2	10898	11532.1	15640.9	14356.2	14998.5	15286.6	13603.5	14445.1	6037.92	11774.1	8906	11136.7	16405.1	13770.9	19173.2	16452.7	17812.9	19112.6
74	9969.06	12426.3	11197.7	10460.6	16642.5	13551.5	12598.6	14187.3	13393	5841.66	9075.62	7458.64	12725.6	16696.9	14711.2	15866.1	17157.5	16511.8	16642.2	18769.8	17706	22841.6	19092.9	20967.3	17405.2	19931.6	18668.4	18298.2	15507.8	16903	12231.3	10767.5	11499.4	15861.4	14562.6	15212	15510.3	13683.7	14597	5927.34	11903.9	8915.61	11080.8	16247	13663.9	19013.7	16495.1	17754.4	18929.7
75	9663.04	12134.1	10898.6	10391	16703.3	13547.1	12825.5	14122.6	13474	5819.01	8942.51	7380.76	12675.5	16613.9	14644.7	15674.7	16915	16294.9	16480.3	18385.4	17432.9	22496.3	18862.2	20679.3	17305.6	19944.5	18625	18470.3	15319	16894.7	12168.4	10743.5	11455.9	16078.8	14551.2	15315	15564.8	14096.9	14830.8	5938.48	11883.1	8910.79	10821.7	16041.8	13431.7	18654.1	16152.6	17403.3	19032.5
76	9599.44	11982.5	10791	10197.8	16525.8	13361.8	12678.6	14282.7	13480.7	5779.82	9110.48	7445.15	12493.1	16637.7	14565.4	15553.7	16672.3	16113	16245.5	18312.5	17279	22147.3	18625.9	20386.6	16920.9	19800.1	18360.5	18039.6	15224.2	16631.9	12175.5	10686.9	11431.2	15971.5	14239.1	15105.3	15521.6	14231.4	14876.5	5864.88	11936.8	8900.85	10816.1	15939	13377.6	18546.3	15998.9	17272.6	18966.8
77	9724.71	11866.4	10795.6	10532.8	16380.9	13456.9	12857	14241.3	13549.2	5858.77	8867.46	7363.11	12442.4	16456.9	14449.7	15449.9	16503.8	15976.8	15920.9	18127.9	17024.4	21701.1	18384	20042.5	16759	19720.3	18239.6	18122	15068.6	16595.3	12380.1	10807.7	11593.9	16227.8	14187	15207.4	15810.3	14207.2	15008.7	5973.68	12398.9	9186.29	10744.7	15722.6	13233.6	18289.4	15930.1	17109.8	18858.4
78	9262.59	11871	10566.8	10587.9	16408.1	13498	12925.8	14581.9	13753.9	5822.53	8930.72	7376.63	12307	16627.9	14467.5	15391.6	16388.7	15890.1	15895.1	18285.1	17090.1	21440.7	18143.4	19792	16510.1	19700.5	18105.3	18038.7	15249.6	16644.2	12370.9	10576.3	11473.6	16385.6	14114.9	15250.2	15959.1	14588.5	15273.8	5923.66	12444.2	9183.95	10579.1	15579.6	13079.4	18059.9	15782	16921	19020.1
79	9282.97	11734.9	10508.9	10680.4	16373.8	13527.1	13065	14640.5	13852.7	5925.58	8894.06	7409.82	12333.2	16484	14408.6	15202.4	16335	15768.7	15415.7	18082	16748.8	21237.1	18275.2	19756.2	16335.3	19626	17980.6	17823.7	15027.4	16425.5	12345.6	10515.6	11430.6	16466.2	14048.6	15257.4	15949.2	14621.2	15285.2	5737.51	12352.7	9045.12	10454	15461.3	12957.6	18134.3	16027.5	17080.9	18472.9
80	9295.17	11583.6	10439.4	10441.7	16484.4	13463	13269.8	14535.4	13902.6	6063.02	8896.42	7479.72	12224.1	16165.8	14195	15124.9	16159.7	15642.3	15268.9	17657	16463	20740.8	17848.9	19294.9	16111.9	19562.2	17837	17809.4	14954.8	16382.1	12210.8	10518.4	11364.6	16361.3	14090.4	15225.9	16425	14894.9	15660	5768.05	12693.3	9230.69	10350.3	15368.2	12859.2	17591.1	16002.1	16796.6	18368.1
81	9310.28	11367.8	10339	10477.2	16330.8	13404	12978.9	14875.9	13927.4	6033.42	8647.16	7340.29	11791.2	15858.5	13824.9	14812.7	15883	15347.9	15084.1	17357.9	16221	20393	17832.2	19112.6	15886.1	19393.7	17639.9	17403.8	14787.5	16095.6	12241.7	10446.9	11344.3	16338.5	13893.4	15115.9	16193.3	14845.9	15519.6	5714.63	12717.2	9215.9	10319.4	15127.2	12723.3	17404	16057.4	16730.7	18193.6
82	9394.98	11381	10388	10324.8	16168.8	13246.8	13023.2	14711	13867.1	5780.56	8805.4	7292.98	11447.1	15925.6	13686.4	14568.3	15712.7	15140.5	14776.3	17043.9	15910.1	20083.7	17267.5	18675.6	15620	19242.2	17431.1	17091	14693.3	15892.1	12267.8	10453.4	11360.6	16337	13664.3	15000.6	16328.6	15010.9	15669.8	5760.43	12901.1	9330.77	9934.72	15053.6	12494.1	17175.1	15898.4	16536.7	17927.3
83	9136.3	11284.8	10210.5	10171.6	16011.6	13091.6	12906.9	14860.4	13883.6	5593.44	8743.05	7168.24	11568.5	15608	13588.2	14352.9	15450.5	14901.7	14278.2	16325.6	15301.9	19347.1	16791.2	18069.2	15062	18700.7	16881.3	16803.4	14452.6	15628	12090.1	10563.4	11326.8	16088.1	13456.1	14772.1	16350.8	14975.7	15663.3	5653.71	13194.8	9424.25	9730.82	14946	12338.4	16679.4	15530.1	16104.7	17487.8
84	9027.18	11273.4	10150.3	10147	15763	12955	12927	14628.3	13777.7	5770.48	8517.22	7143.85	11376.5	15400.9	13388.7	14009.9	15358.2	14684	14002.6	15974.1	14988.3	18967.8	16566.1	17766.9	15146.3	18554.8	16850.5	16471.4	14004	15237.7	12122.5	10637	11379.7	15913.3	13254	14583.7	16433.2	14858.1	15645.6	5606.02	12793.9	9199.97	9879.49	14453.2	12166.4	16548	15346.8	15947.4	17370.1
85	8764.89	11203.3	9984.1	9954.3	15762.9	12858.6	12811.6	14280.6	13546.1	5719.3	8431.34	7075.32	11065.1	15270.6	13167.8	14100.2	15080.8	14590.5	13814.7	15439.3	14627	18716.6	16237.7	17477.1	14689.9	18219.5	16454.7	16121.1	13820.1	14970.6	11923.5	10651.3	11287.4	15731.9	13088.1	14410	16164.6	14773.2	15468.9	5343.74	12861	9102.39	9593.8	14183.2	11888.5	16262.9	15274.2	15768.5	17186.9
86	8856.78	10687.2	9772.01	10125.4	15317.4	12721.4	12755.8	14348	13551.9	5672.84	8266.87	6969.85	10766	15008.1	12887	13967.6	14911.3	14439.5	13777.3	14969.4	14373.4	18526.3	15720.9	17123.6	14163.2	17882.1	16022.6	15748.6	13502.6	14625.6	11663.9	10183.7	10923.8	15527.4	12980.5	14253.9	16045.4	14941.5	15493.5	5274.57	12674.7	8974.63	9488.31	14056	11772.1	15822	15153.1	15487.6	16716.3
87	8458.77	10556.8	9507.78	9898.96	15185	12542	12373.5	14182.5	13278	5508.48	8425.05	6966.77	10651	14852.7	12751.8	13570.7	14819.9	14195.3	13536.4	14416.8	13976.6	18044.9	15688.6	16866.8	13959.8	17597.6	15778.7	15302.7	13333.8	14318.3	11494.8	9978.51	10736.6	15372.6	12932	14152.3	16002.3	14578.6	15290.5	5205.25	12371.8	8788.5	9052.06	13779.8	11415.9	15598.9	14907.2	15253.1	16642.1
88	8475.48	10499.5	9487.5	9741.27	14981.5	12361.4	12282.3	13844.2	13063.2	5571.46	8194.4	6882.93	10467.2	14617.7	12542.4	13586.3	14850	14218.1	13180.3	14036.3	13608.3	17903.1	15340.2	16621.6	13682.1	17386.2	15534.2	14836.4	13168.6	14002.5	11232.5	9941.67	10587.1	14948.6	12716.7	13832.6	15662.5	14163.1	14912.8	5179.01	12131.1	8655.08	8885.79	13479.5	11182.6	15440.1	14612.1	15026.1	16496.6
89	8515.32	10166.7	9341.03	9858.7	14898.3	12378.5	12265.4	13802.3	13033.9	5843.85	8108.69	6976.27	10504.5	14484.5	12494.5	13476.8	14420	13948.4	13072.4	13206.2	13139.3	17475.3	14993.4	16234.4	13456.7	17023.2	15240	14547	12821.4	13684.2	11047.9	9787.77	10417.9	14769.5	12569.5	13669.5	15642.8	14076.5	14859.7	5171.17	12150.7	8660.93	8818.83	13361.1	11090	15290.4	14408.4	14849.4	16102.5
90	8266.41	10010.8	9138.6	9586.73	14527.4	12057.1	12045.7	13244.7	12645.2	5512.69	8111.07	6811.88	10072.3	14322.6	12197.4	13127.2	14160	13643.6	12494.3	12777.7	12636	17000.2	14599.3	15799.8	13138.5	16722.4	14930.4	14347.2	12509.4	13428.3	10591.7	9852.08	10221.9	14418.5	12526.3	13472.4	15202.8	13748.7	14475.8	5131.95	11748.3	8440.15	8842.51	13180.5	11011.5	15153.8	14111.2	14632.5	15856.9
91	8009.72	9731.42	8870.57	9390.59	14599.9	11995.2	11981.5	13099.5	12540.5	5469.31	8048.4	6758.85	9899.18	14247.4	12073.3	12916.3	14300.6	13608.5	12386.7	12489.9	12438.3	16661.9	14504	15582.9	12970.4	16412.5	14691.5	13831.7	12170.3	13001	10252.2	9521.42	9886.79	13904.9	12421.5	13163.2	14777.2	13494.6	14135.9	4946.76	11178.2	8062.48	8901.47	12942	10921.7	14863.2	13593.1	14228.1	15363.5
92	7695.91	9414.82	8555.36	9054.67	14037.8	11546.2	11556	12589.9	12072.9	5525.23	7722.73	6623.98	9778.29	14077.4	11927.8	12687.8	14038.6	13363.1	12039.6	12044.4	12042	16357	13889.1	15123	12342.8	15969	14155.9	13542.5	12013.1	12777.8	10153.7	9434.86	9794.3	13677	12197.8	12937.4	14498.3	13223.6	13861	4868.56	11210.5	8039.51	8605.21	12718.8	10662	14498.1	13200.3	13849.2	15002.7
93	7844.71	9282.88	8563.8	9120.83	13610.8	11365.8	11606.4	12440.5	12023.5	5358.6	7581.16	6469.88	9745.62	13650.7	11698.2	12496.5	13805.2	13150.9	11709.8	11585	11647.4	15887.2	13562.7	14724.9	12202	15670.9	13936.5	13129.8	11710.7	12420.3	9723.32	9345.74	9534.53	13657.8	11899.9	12778.9	14089.1	13043.9	13566.5	4914.28	10914.8	7914.53	8323.88	12377.8	10350.8	14384.1	12809.9	13597	14764.5
94
95
[truncated: 200 more columns]

## Sheet: CsTPS37FN DTm
	MES (pH 5.5)			BIS-TRIS (pH 6)			BIS-TRIS (pH 6.5)			HEPES (pH 7)			HEPES (pH 7.5)			TRIS (pH 8)			TRIS (pH 8.5)			CAPS (pH 9)			SEC Buffer
-	20	20	20	32.91	32.96	32.95	60.4	60.45	60.44	65.42	65.48	65.47	81.42	81.48	81.45	55.45	55.51	55.48	60.45	60.51	60.48	35.18	35.24	35.22	75.17	76.46	77.06
50mM NaCl	20.31	20.21	20.23	45.28	45.35	45.33	49.64	49.69	49.67	65.22	65.27	65.26	75.1	75.16	75.13	59.1	59.14	59.12	64.24	64.21	-16.96	38.42	38.48	38.45	-	-	-
100mM NaCl	22.14	22.18	22.16	48.73	48.78	48.77	52.25	52.31	52.31	68.87	68.92	68.9	78.38	78.43	78.39	81.13	81.13	81.13	66.7	66.75	66.73	40.91	40.96	40.92	-	-	-
200mM NaCl	23.8	23.9	23.85	50.32	50.38	50.36	54.75	54.8	54.79	71.2	71.28	71.25	80.82	80.87	80.86	64.3	64.34	64.32	69.31	69.37	69.34	43.5	43.55	43.51	-	-	-
50mM KCl	25.22	25.19	25.2	52.85	52.92	52.94	57.4	57.48	57.47	73.85	73.91	73.91	76.4	76.45	76.42	58	58.05	58.03	62.72	62.78	62.75	37.92	37.97	37.93	-	-	-
100mM KCl	21.7	21.78	21.76	47.45	47.5	47.48	51.84	51.91	51.89	67.38	67.45	67.44	78.87	78.93	78.91	60.42	60.48	60.45	65.13	65.19	65.17	40.16	40.21	40.18	-	-	-
200mM KCl	23.3	23.38	23.35	49.65	49.7	49.66	53.65	53.68	53.68	69.72	69.79	69.77	81.42	81.47	81.45	63.02	63.07	63.05	67.8	67.87	67.85	42.73	42.79	42.76	-	-	-
50mM MgCl	24.85	24.91	24.91	51.88	51.92	51.91	56.08	56.12	56.1	72.35	72.4	72.39	85.18	85.24	85.21	66.42	66.48	66.46	71.09	71.15	71.12	46.21	46.26	46.23	-	-	-
100mM MgCl	28.4	28.49	28.46	55.3	55.38	55.35	60.34	60.42	60.38	76.08	76.15	76.12	87.78	87.85	87.83	69.15	69.21	69.18	73.77	73.83	73.8	48.87	48.91	48.9	-	-	-
200mM MgCl	30.18	30.23	30.22	57.82	57.88	57.85	62.85	62.92	62.89	78.6	78.65	78.63	90.38	90.43	90.4	72	72.06	72.04	76.38	76.44	76.41	51.59	51.65	51.63	-	-	-
	MES (pH 5.5) - SEC Buffer		BIS-TRIS (pH 6) - SEC Buffer		BIS-TRIS (pH 6.5) - SEC Buffer		HEPES (pH 7) - SEC Buffer		HEPES (pH 7.5) - SEC Buffer		TRIS (pH 8) - SEC Buffer		TRIS (pH 8.5) - SEC Buffer		CAPS (pH 9) - SEC Buffer		SEC Buffer - SEC Buffer
	Mean	SEM	Mean	SEM	Mean	SEM	Mean	SEM	Mean	SEM	Mean	SEM	Mean	SEM	Mean	SEM	Mean	SEM
-	-56.46	0	-43.52	0.0152753	-16.03	0.0152753	-11.0033	0.0185592	4.99	0.0173205	-20.98	0.0173205	-15.98	0.0173205	-41.2467	0.0176383	0	0
50mM NaCl	-56.21	0.0305505	-31.14	0.0208167	-26.7933	0.0145297	-11.21	0.0152753	-1.33	0.0173205	-17.34	0.011547	-39.2967	27.0617	-38.01	0.0173205	-	-
100mM NaCl	-54.3	0.011547	-27.7	0.0152753	-24.17	0.02	-7.56333	0.0145297	1.94	0.0152753	4.67	0	-9.73333	0.0145297	-35.53	0.0152753	-	-
200mM NaCl	-52.61	0.0288675	-26.1067	0.0176383	-21.68	0.0152753	-5.21667	0.0233333	4.39	0.0152753	-12.14	0.011547	-7.12	0.0173205	-32.94	0.0152753	-	-
50mM KCl	-51.2567	0.00881917	-23.5567	0.0272845	-19.01	0.0251661	-2.57	0.02	-0.0366667	0.0145297	-18.4333	0.0145297	-13.71	0.0173205	-38.52	0.0152753	-	-
100mM KCl	-54.7133	0.024037	-28.9833	0.0145297	-24.58	0.0208167	-9.03667	0.0218581	2.44333	0.0176383	-16.01	0.0173205	-11.2967	0.0176383	-36.2767	0.0145297	-	-
200mM KCl	-53.1167	0.0233333	-26.79	0.0152753	-22.79	0.01	-6.7	0.0208167	4.98667	0.0145297	-13.4133	0.0145297	-8.62	0.0208167	-33.7	0.0173205	-	-
50mM MgCl	-51.57	0.02	-24.5567	0.0120185	-20.36	0.011547	-4.08	0.0152753	8.75	0.0173205	-10.0067	0.0176383	-5.34	0.0173205	-30.2267	0.0145297	-	-
100mM MgCl	-48.01	0.0264575	-21.1167	0.0233333	-16.08	0.023094	-0.343333	0.0202759	11.36	0.0208167	-7.28	0.0173205	-2.66	0.0173205	-27.5667	0.0120185	-	-
200mM MgCl	-46.25	0.0152753	-18.61	0.0173205	-13.5733	0.0202759	2.16667	0.0145297	13.9433	0.0145297	-4.42667	0.0176383	-0.05	0.0173205	-24.8367	0.0176383	-	-
