# Supplementary material for: Integrated platform for structural and functional analysis of terpene synthases of Cannabis sativa
Source: PeerJ. 2025 Jul 10;13:e19723. doi: 10.7717/peerj.19723 (PMC12256043; doi:10.7717/peerj.19723)
Supplement: Supplemental Information 3 [file peerj-13-19723-s003.xlsx]

## Sheet: GPP Michaelis-Menten (nonlin. r
GPP conc. (µM)	CsTPS19BL			CsTPS1SK			CsTPS3FN			CsTPS13PK			CsTPS5FN			CsTPS37FN			CsTPS12PK
100	0.0083	0.00896	0.00914	0.19011	0.17276	0.18474	0.01919	0.0186	0.02053	0.078643	0.075752	0.085066	0.02436	0.02476	0.0242	0.06909	0.06735	0.07091	0.00837359	0.00772947	0.00805153
50	0.00656	0.00661	0.00587	0.17895	0.18119	0.1739	0.01879	0.0173	0.01747	0.06961	0.074718	0.082757	0.02067	0.0193	0.02077	0.05855	0.05307	0.06057	0.00692432	0.00708535	0.00708535
25	0.00444	0.00441	0.0043	0.17309	0.14822	0.16116	0.01547	0.01492	0.01685	0.057029	0.061032	0.057661	0.01494	0.01685	0.01487	0.03987	0.04049	0.04339	0.00483092	0.00466989	0.00450886
12.5	0.00274	0.00278	0.00277	0.13041	0.12736	0.1382	0.01337	0.01504	0.01513	0.045291	0.047771	0.045552	0.01089	0.01025	0.01045	0.02889	0.02788	0.02601	0.00241546	0.00257649	0.00225443
6.25	0.00152	0.00155	0.00161	0.08621	0.08482	0.08498	0.01104	0.01135	0.01211	0.03009	0.031079	0.028394	0.00674	0.00636	0.00624	0.01703	0.01673	0.01561	0.00144928	0.00112721	0.00161031
3.13	0.00089	0.0008	0.00078	0.05706	0.05157	0.05661	0.008	0.00777	0.00803	0.017235	0.016492	0.017177	0.00349	0.00321	0.00357	0.00927	0.00911	0.00955	0.000483092	0.000483092	0.000483092
1.56	0.00042	0.0004	0.00041	0.02961	0.03331	0.03196	0.0052	0.00494	0.00533	0.009652	0.009057	0.010383	0.00191	0.00192	0.00191	0.00426	0.00479	0.00469	0.000644122	0.000161031	-0.000322061
0.78	0.00021	0.00023	0.00021	0.01831	0.01862	0.01933	0.00302	0.00286	0.00289	0.005423	0.005035	0.00552	0.00098	0.00098	0.0009	0.00251	0.00235	0.00259	-0.000161031	0	-0.000161031
0.39	0.00011	0.00011	0.00011	0.00907	0.0085	0.00849	0.00163	0.00163	0.00158	0.002816	0.002444	0.002555	0.00053	0.0005	0.00052	0.00132	0.00124	0.00118	0.000805153	-0.000161031	-0.000644122
0.2	6e-05	6e-05	5e-05	0.00535	0.00514	0.00452	0.00082	0.0008	0.00085	0.001363	0.001299	0.001385	0.00025	0.00026	0.00026	0.00066	0.00065	0.00064	-0.000483092	0.000161031	-0.000322061
0.1	2e-05	3e-05	3e-05	0.00246	0.00252	0.00246	0.00044	0.00042	0.00043	0.000679	0.00074	0.000709	0.00013	0.00012	0.00012	0.00033	0.00036	0.0003	-0.000161031	0	-0.000644122
0.05	2e-05	1e-05	1e-05	0.00126	0.0012	0.00126	0.00025	0.00024	0.00026	0.000308	0.000361	0.000317	6e-05	6e-05	6e-05	0.00017	0.00018	0.00017	-0.000161031	0.000161031	-0.000322061
0.02	1e-05	0	0	0.00049	0.00053	0.00052	0.00013	0.00012	0.00012	0.000139	0.000141	0.000142	3e-05	3e-05	3e-05	8e-05	8e-05	8e-05	0	0	0
0.01	0	0	0	0.00022	0.00022	0.00021	6e-05	6e-05	5e-05	6.6e-05	6.4e-05	6.9e-05	2e-05	2e-05	2e-05	4e-05	3e-05	3e-05	0	0	0
0	0	0	0	0	0	0	0	0	0	0	0	0	0	0	0	0	0	0	0	0	0
Michaelis-Menten
Best-fit values
Vmax	0.01291			0.2038			0.01964			0.09183			0.02999			0.08842			0.01191	0.01191
Km	48.45			7.809			4.569			12.96			23.3			27.71			41.85	41.85
95% CI (profile likelihood)
Vmax	0.01234 to 0.01353			0.1985 to 0.2093			0.01917 to 0.02012			0.08890 to 0.09490			0.02932 to 0.03068			0.08594 to 0.09104			0.01078 to 0.01328	0.01078 to 0.01328
Km	44.06 to 53.41			7.131 to 8.549			4.158 to 5.019			11.73 to 14.34			21.96 to 24.73			25.79 to 29.79			33.56 to 52.74	33.56 to 52.74
Goodness of Fit
Degrees of Freedom	43			43			43			43			43			43			37	37
R squared	0.9969			0.9949			0.9947			0.9944			0.9983			0.9977			0.9811	0.9811
Sum of Squares	9.888e-07			0.001076			1.178e-05			0.0001981			4.742e-06			5.198e-05			5.83e-06	5.83e-06
Sy.x	0.0001516			0.005002			0.0005235			0.002146			0.0003321			0.001099			0.000397	0.000397
Constraints
Km	Km > 0			Km > 0			Km > 0			Km > 0			Km > 0			Km > 0			Km > 0	Km > 0
Number of points
# of X values	45			45			45			45			45			45			45	39
# Y values analyzed	45			45			45			45			45			45			39	39

## Sheet: FPP Michaelis-Menten (nonlin. r
FPP conc. (µM)	CsTPS19BL			CsTPS16CC			CsTPS9FN			CsTPS20CT
100	0.0083	0.00896	0.00914	0.12833	0.13777	0.14149	0.08185	0.08341	0.07416	0.0160494	0.00831991	0.00735373
50	0.00656	0.00661	0.00587	0.11216	0.1049	0.11145	0.0652	0.05804	0.05831	0.0146001	0.0131508	0.0120236
25	0.00444	0.00441	0.0043	0.07015	0.07654	0.07154	0.04151	0.04376	0.04394	0.00735373	0.00960816	0.0092861
12.5	0.00274	0.00278	0.00277	0.04766	0.04849	0.04825	0.02623	0.02594	0.02635	0.00654858	0.00574342	0.00429415
6.25	0.00152	0.00155	0.00161	0.02442	0.02595	0.02496	0.01438	0.01393	0.01412	0.00381106	0.00316694	0.00332797
3.13	0.00089	0.0008	0.00078	0.01326	0.01385	0.01402	0.00759	0.00828	0.00752	0.00155663	0.00155663	0.00155663
1.56	0.00042	0.0004	0.00041	0.00673	0.00716	0.00728	0.00347	0.00431	0.0042	0.00171766	0.00123457	0.000751476
0.78	0.00021	0.00023	0.00021	0.00385	0.0041	0.00329	0.00194	0.00209	0.0021	0.000912507	0.00107354	0.000912507
0.39	0.00011	0.00011	0.00011	0.00183	0.00186	0.00192	0.00108	0.00097	0.0009	0.00187869	0.000912507	0.000429415
0.2	6e-05	6e-05	5e-05	0.00091	0.00091	0.00095	0.00053	0.00051	0.0005	0.000590446	0.00123457	0.000751476
0.1	2e-05	3e-05	3e-05	0.00048	0.00048	0.00042	0.00027	0.00028	0.00027	0.000912507	0.00107354	0.000429415
0.05	2e-05	1e-05	1e-05	0.00025	0.00025	0.00024	0.00014	0.00015	0.00014	6.25315e-06	8.46014e-06	5.14965e-06
0.02	1e-05	0	0	0.0001	0.00011	0.0001	6e-05	6e-05	6e-05	0	0	0
0.01	0	0	0	4e-05	5e-05	4e-05	3e-05	3e-05	3e-05	0	0	0
0	0	0	0	0	0	0	0	0	0	0	0	0
Michaelis-Menten
Best-fit values
Vmax	0.0102			0.1895			0.1127			0.0144
Km	17.32			38.43			41.7			16.86
95% CI (profile likelihood)
Vmax	0.01234 to 0.01353			0.1832 to 0.1961			0.1080 to 0.1177			0.01220 to 0.01718
Km	44.06 to 53.41			35.60 to 41.52			37.97 to 45.88			10.44 to 27.24
Goodness of Fit
Degrees of Freedom	43			43			43			37
R squared	0.9969			0.9976			0.9966			0.8791
Sum of Squares	9.888e-07			0.0001953			9.257e-05			9.26e-05
Sy.x	0.0001516			0.002131			0.001467			0.001582
Constraints
Km	Km > 0			Km > 0			Km > 0			Km > 0
Number of points
# of X values	45			45			45			45
# Y values analyzed	45			45			45			39
